# Supplementary material for: One-Year Functional Decline in COVID-19 and Non-COVID-19 Critically Ill Survivors: A Prospective Study Incorporating a Pre-ICU Status Assessment
Source: MDPI journal article supplement (doi:10.3390/healthcare10102023), 2022-10-13

**One-year functional decline in COVID-19 and non-COVID-19 critically ill survivors: a prospective study incorporating a pre-ICU status assessment.**

**Supplemental materials**

**Supplemental Table S1: Demographics and 1-year outcomes in Wave 1 and Wave 2 subgroups in the COVID group**

*Data are presented as count and percentage or as median with first and third quartiles [Q1-Q3].*

*BMI: body mass index; ICU: intensive care unit, LOS: length of stay; SAPS II: Simplified Acute Physiology Score; SOFA: Sequential Organ Failure Assessment*

| Data                                         | Wave 1 subgroup<br>n=54 | Wave 2 subgroup<br>n=78 | p value |
|----------------------------------------------|-------------------------|-------------------------|---------|
| Demographics                                 |                         |                         |         |
| Age, y                                       | 64 [50-70]              | 63.5 [54.7-71]          | 0.309   |
| Male, n (%)                                  | 35 (64.8)               | 50 (64.1)               | >0.999  |
| Weight, kg                                   | 91 [80-104]             | 86 [77.2-98.8]          | 0.034   |
| BMI, kg/m <sup>2</sup>                       | 30.9 [27.5-35]          | 30.1 [26.1-33.8]        | 0.103   |
| Retired before ICU admission, n (%)          | 28 (51.8)               | 42 (53.8)               | 0.864   |
| SOFA at admission                            | 4 [3-6]                 | 4 [3-5]                 | 0.371   |
| SAPS II                                      | 34.5 [26-43]            | 32.5 [26-50]            | 0.811   |
| Mechanical ventilation, n (%)                | 38 (70.3)               | 25 (32.1)               | <0.001  |
| Duration of mechanical ventilation, d        | 16 [10-23]              | 9 [4-28]                | 0.546   |
| Neuromuscular blocking agent, n(%)           | 12 (22.2)               | 22 (28.2)               | 0.545   |
| Duration of NMBA, d                          | 3 [3-3.5]               | 2.5 [1-5]               | 0.283   |
| Tracheostomy, n (%)                          | 9 (16.7)                | 6 (7.7)                 | 0.162   |
| Vasopressor support, n (%)                   | 28 (51.9)               | 18 (23.1)               | <0.001  |
| Duration of norepinephrine administration, d | 3 [2-9]                 | 1.5 [1-9.2]             | 0.09    |
| Renal replacement therapy, n (%)             | 6 (11.1)                | 4 (5.1)                 | 0.316   |
| Duration of renal replacement therapy, d     | 18 [17-19]              | 37 [35-39]              | 0.2     |
| Extracorporeal membrane oxygenation, n (%)   | 0                       | 0                       |         |

|                                               |             |                |                  |
|-----------------------------------------------|-------------|----------------|------------------|
| ICU LOS, d                                    | 15.5 [6-27] | 6 [4-11]       | <i>&lt;0.001</i> |
| Hospital LOS, d                               | 27 [14-46]  | 17.5 [12-36.2] | 0.121            |
| 1-year outcomes                               |             |                |                  |
| Barthel Index < 100, n (%)                    | 22 (40.7)   | 26 (33.3)      | 0.4623           |
| Return to previous level of activities, n (%) | 34 (63)     | 42 (53.8)      | 0.371            |
| At least one hospital readmission, n (%)      | 14 (25.9)   | 20 (25.6)      | >0.999           |
| At least one fall, n (%)                      | 4 (7.4)     | 12 (15.4)      | 0.188            |
| At least one fracture, n (%)                  | 1 (1.9)     | 2 (2.6)        | >0.999           |

## Supplemental Table S2: Risk factors for functional decline in the global cohort.

*BMI: body mass index; CKD: chronic kidney disease; ECMO: extracorporeal membrane oxygenation;*

*ICU: intensive care unit, LOS: length of stay; SAPS II: Simplified Acute Physiology Score; SOFA:*

*Sequential Organ Failure Assessment*

*Coeff: regression coefficient; SE: standard error*

*R<sup>2</sup> measures the strength of the relationship between the linear model and the dependent variable (0-100%)*

| Variable             | Explicative factor                                  | Univariate |        |       |         | Multivariate |        |        |      |         |
|----------------------|-----------------------------------------------------|------------|--------|-------|---------|--------------|--------|--------|------|---------|
|                      |                                                     | N          | Coeff  | SE    | p-value | N            | R² (%) | Coeff  | SE   | p-value |
| <u>Barthel index</u> |                                                     |            |        |       |         | 216          | 20.0   |        |      |         |
|                      | Age, y                                              | 220        | -0.21  | 0.07  | 0.0037  |              |        | -0.12  | 0.07 | 0.072   |
|                      | Sex, Male                                           | 220        | 2.19   | 1.92  | 0.25    |              |        |        |      |         |
|                      | Weight, kg                                          | 217        | -0.03  | 0.05  | 0.50    |              |        |        |      |         |
|                      | BMI, kg/m²                                          | 216        | -0.15  | 0.15  | 0.32    |              |        |        |      |         |
|                      | Retired before ICU admission                        | 220        | -2.69  | 1.80  | 0.14    |              |        |        |      |         |
|                      | <b>Comorbidities</b>                                | 220        | -2.24  | 2.65  | 0.40    |              |        |        |      |         |
|                      | CKD (yes vs no)                                     | 220        | -0.16  | 1.85  | 0.93    |              |        |        |      |         |
|                      | Diabetes (yes vs no)                                | 220        | -3.55  | 1.88  | 0.059   |              |        |        |      |         |
|                      | Hypertension (yes vs no)                            | 220        | 0.62   | 1.80  | 0.73    |              |        |        |      |         |
|                      | Cardiovascular (yes vs no)                          | 220        | -3.02  | 2.19  | 0.17    |              |        |        |      |         |
|                      | Respiratory (yes vs no)                             | 219        | -3.16  | 4.81  | 0.51    |              |        |        |      |         |
|                      | Immunosuppression (yes vs no)                       | 220        | -1.05  | 0.73  | 0.15    |              |        |        |      |         |
|                      | <i>Total number of these comorbidities (0 to 6)</i> |            |        |       |         |              |        |        |      |         |
|                      | Admission type (surgical vs medical)                | 220        | 1.67   | 2.07  | 0.42    |              |        |        |      |         |
|                      | Admission failure                                   | 220        |        |       | 0.93    |              |        |        |      |         |
|                      | Cardiovascular (vs pulmonary)                       |            | 0.27   | 2.24  |         |              |        |        |      |         |
|                      | Neurologic (vs pulmonary)                           |            | -2.56  | 4.38  |         |              |        |        |      |         |
|                      | Other (vs pulmonary)                                |            | 0.69   | 3.20  |         |              |        |        |      |         |
|                      | SOFA at admission                                   | 147        | -0.53  | 0.40  | 0.19    |              |        |        |      |         |
|                      | SAPS II                                             | 132        | -0.16  | 0.09  | 0.069   |              |        |        |      |         |
|                      | COVID-19 (yes vs no)                                | 220        | 0.95   | 1.83  | 0.61    |              |        |        |      |         |
|                      | Mechanical ventilation (yes vs no)                  | 220        | -4.94  | 1.77  | 0.0056  |              |        |        |      |         |
|                      | Neuromuscular blocking agent (yes vs no)            | 220        | -5.25  | 2.18  | 0.017   |              |        |        |      |         |
|                      | Tracheostomy (yes vs no)                            | 220        | -4.76  | 3.35  | 0.16    |              |        |        |      |         |
|                      | Vasopressor support (yes vs no)                     | 220        | -5.13  | 1.84  | 0.0058  |              |        |        |      |         |
|                      | Renal replacement therapy (yes vs no)               | 220        | -12.94 | 3.86  | 0.0010  |              |        | -12.86 | 4.32 | 0.0032  |
|                      | ECMO (yes vs no)                                    | 220        | 4.45   | 13.37 | 0.74    |              |        |        |      |         |
|                      | ICU LOS, d (log)                                    | 220        | -1.31  | 0.83  | 0.12    |              |        | 2.92   | 1.37 | 0.034   |
|                      | Hospital LOS, d (log)                               | 216        | -4.47  | 0.98  | <0.0001 |              |        | -4.04  | 1.59 | 0.012   |
|                      | Home at hospital discharge (yes vs no)              | 220        | 11.45  | 3.28  | 0.0006  |              |        | 6.23   | 3.32 | 0.062   |
|                      | Rehabilitation (yes vs no)                          | 220        | -8.50  | 1.93  | <0.0001 |              |        | -4.20  | 2.36 | 0.077   |
| <u>EQ-5D score</u>   |                                                     |            |        |       |         | 216          | 19.3   |        |      |         |
|                      | Age, y                                              | 220        | 0.00   | 0.01  | 0.84    |              |        |        |      |         |
|                      | Sex, Male                                           | 220        | 0.03   | 0.28  | 0.92    |              |        |        |      |         |
|                      | Weight, kg                                          | 217        | 0.01   | 0.01  | 0.061   |              |        |        |      |         |
|                      | BMI, kg/m²                                          | 216        | 0.03   | 0.02  | 0.20    |              |        |        |      |         |
|                      | Retired before ICU admission                        | 220        | -0.48  | 0.26  | 0.066   |              |        | -0.59  | 0.25 | 0.019   |
|                      | <b>Comorbidities</b>                                |            |        |       |         |              |        |        |      |         |
|                      | CKD (yes vs no)                                     | 220        | 0.00   | 0.38  | 0.99    |              |        |        |      |         |
|                      | Diabetes (yes vs no)                                | 220        | 0.37   | 0.26  | 0.16    |              |        |        |      |         |
|                      | Hypertension (yes vs no)                            | 220        | 0.02   | 0.27  | 0.95    |              |        |        |      |         |
|                      | Cardiovascular (yes vs no)                          | 220        | -0.41  | 0.26  | 0.11    |              |        |        |      |         |
|                      | Respiratory (yes vs no)                             | 220        | 0.49   | 0.31  | 0.12    |              |        | 0.46   | 0.29 | 0.12    |
|                      | Immunosuppression (yes vs no)                       | 219        | -0.46  | 0.69  | 0.51    |              |        |        |      |         |

| Variable                      | Explicative factor                                  | N   | Univariate |       |         | Multivariate |                    |       |             |
|-------------------------------|-----------------------------------------------------|-----|------------|-------|---------|--------------|--------------------|-------|-------------|
|                               |                                                     |     | Coeff      | SE    | p-value | N            | R <sup>2</sup> (%) | Coeff | SE p-value  |
|                               | <i>Total number of these comorbidities (0 to 6)</i> | 220 | 0.04       | 0.11  | 0.72    |              |                    |       |             |
|                               | Admission type (surgical vs medical)                | 220 | -0.64      | 0.30  | 0.032   |              |                    |       |             |
|                               | Admission failure                                   | 220 |            |       | 0.25    |              |                    |       |             |
|                               | Cardiovascular (vs pulmonary)                       |     | -0.54      | 0.32  |         |              |                    |       |             |
|                               | Neurologic (vs pulmonary)                           |     | 0.41       | 0.62  |         |              |                    |       |             |
|                               | Other (vs pulmonary)                                |     | 0.21       | 0.46  |         |              |                    |       |             |
|                               | SOFA at admission                                   | 147 | 0.07       | 0.06  | 0.31    |              |                    |       |             |
|                               | SAPS II                                             | 132 | 0.03       | 0.01  | 0.051   |              |                    |       |             |
|                               | COVID-19 (yes vs no)                                | 220 | 0.16       | 0.26  | 0.54    |              |                    |       |             |
|                               | Mechanical ventilation (yes vs no)                  | 220 | 0.60       | 0.26  | 0.020   |              |                    |       |             |
|                               | Neuromuscular blocking agent (yes vs no)            | 220 | 1.25       | 0.31  | <0.0001 |              |                    | 0.67  | 0.35 0.055  |
|                               | Tracheostomy (yes vs no)                            | 220 | 0.62       | 0.48  | 0.20    |              |                    | -0.77 | 0.52 0.14   |
|                               | Vasopressor support (yes vs no)                     | 220 | 0.75       | 0.26  | 0.0047  |              |                    |       |             |
|                               | Renal replacement therapy (yes vs no)               | 220 | 1.52       | 0.56  | 0.0072  |              |                    |       |             |
|                               | ECMO (yes vs no)                                    | 220 | 4.71       | 1.90  | 0.014   |              |                    | 2.79  | 1.84 0.13   |
|                               | ICU LOS, d (log)                                    | 220 | 0.48       | 0.13  | 0.0003  |              |                    |       |             |
|                               | Hospital LOS, d (log)                               | 216 | 0.72       | 0.14  | <0.0001 |              |                    | 0.64  | 0.16 0.0001 |
|                               | Home at hospital discharge (yes vs no)              | 220 | -1.06      | 0.48  | 0.027   |              |                    | -0.76 | 0.48 0.11   |
|                               | Rehab (yes vs no)                                   | 220 | 1.22       | 0.28  | <0.0001 |              |                    |       |             |
| <b>EQ-5D VAS</b>              |                                                     |     |            |       |         | 216          | 18.6               |       |             |
|                               | Age, y                                              | 220 | -0.01      | 0.12  | 0.92    |              |                    |       |             |
|                               | Sex, Male                                           | 220 | 0.82       | 3.11  | 0.79    |              |                    |       |             |
|                               | Weight, kg                                          | 217 | 0.00       | 0.08  | 0.95    |              |                    |       |             |
|                               | BMI, kg/m <sup>2</sup>                              | 216 | 0.08       | 0.24  | 0.74    |              |                    |       |             |
|                               | Retired before ICU admission                        | 220 | 4.09       | 2.92  | 0.16    |              |                    | 4.33  | 2.81 0.12   |
|                               | <b>Comorbidities</b>                                |     |            |       |         |              |                    |       |             |
|                               | CKD (yes vs no)                                     | 220 | 0.30       | 4.30  | 0.94    |              |                    |       |             |
|                               | Diabetes (yes vs no)                                | 220 | -7.43      | 2.95  | 0.012   |              |                    | -4.41 | 2.79 0.12   |
|                               | Hypertension (yes vs no)                            | 220 | 3.83       | 3.05  | 0.21    |              |                    |       |             |
|                               | Cardiovascular (yes vs no)                          | 220 | 8.73       | 2.86  | 0.0025  |              |                    |       |             |
|                               | Respiratory (yes vs no)                             | 220 | -1.38      | 3.55  | 0.70    |              |                    |       |             |
|                               | Immunosuppression (yes vs no)                       | 219 | 0.14       | 7.78  | 0.99    |              |                    |       |             |
|                               | <i>Total number of these comorbidities (0 to 6)</i> | 220 | 0.73       | 1.19  | 0.54    |              |                    |       |             |
|                               | Admission type (surgical vs medical)                | 220 | 9.80       | 3.30  | 0.0033  |              |                    |       |             |
|                               | Admission failure                                   | 220 |            |       | 0.0010  |              |                    |       | 0.020       |
|                               | Cardiovascular (vs pulmonary)                       |     | 13.42      | 3.49  |         |              |                    | 9.50  | 5.46        |
|                               | Neurologic (vs pulmonary)                           |     | -6.18      | 6.84  |         |              |                    | -0.62 | 4.74        |
|                               | Other (vs pulmonary)                                |     | 2.82       | 4.99  |         |              |                    | -8.10 | 7.98        |
|                               | SOFA at admission                                   | 147 | -0.34      | 0.70  | 0.62    |              |                    |       |             |
|                               | SAPS II                                             | 132 | -0.13      | 0.15  | 0.39    |              |                    |       |             |
|                               | COVID-19 (yes vs no)                                | 220 | -8.65      | 2.91  | 0.0033  |              |                    |       |             |
|                               | Mechanical ventilation (yes vs no)                  | 220 | -4.91      | 2.89  | 0.091   |              |                    |       |             |
|                               | Neuromuscular blocking agent (yes vs no)            | 220 | -11.49     | 3.49  | 0.0012  |              |                    |       |             |
|                               | Tracheostomy (yes vs no)                            | 220 | -11.88     | 5.39  | 0.029   |              |                    |       |             |
|                               | Vasopressor support (yes vs no)                     | 220 | -4.95      | 3.02  | 0.10    |              |                    |       |             |
|                               | Renal replacement therapy (yes vs no)               | 220 | -16.75     | 6.31  | 0.0085  |              |                    |       |             |
|                               | ECMO (yes vs no)                                    | 220 | -35.24     | 21.51 | 0.10    |              |                    |       |             |
|                               | ICU LOS, d (log)                                    | 220 | -4.51      | 1.47  | 0.0025  |              |                    |       |             |
|                               | Hospital LOS, d (log)                               | 216 | -7.27      | 1.57  | <0.0001 |              |                    | -5.07 | 1.66 0.0025 |
|                               | Home at hospital discharge (yes vs no)              | 220 | 13.54      | 5.38  | 0.012   |              |                    | 15.86 | 5.38 0.0036 |
|                               | Rehab (yes vs no)                                   | 220 | -12.00     | 3.15  | 0.0002  |              |                    |       |             |
| <b>IPAQ-SF (MET-min/week)</b> |                                                     |     |            |       |         | 217          | 12.1               |       |             |
|                               | Age, y                                              | 220 | 20.1       | 10.6  | 0.06    |              |                    |       |             |
|                               | Sex, Male                                           | 220 | -337.5     | 284.2 | 0.24    |              |                    |       |             |
|                               | Weight, kg                                          | 217 | -14.1      | 7.1   | 0.049   |              |                    | -13.9 | 7.0 0.049   |
|                               | BMI, kg/m <sup>2</sup>                              | 216 | -12.3      | 21.7  | 0.57    |              |                    |       |             |
|                               | Retired before ICU admission                        | 220 | 767.3      | 263.7 | 0.0040  |              |                    | 679.2 | 262.2 0.010 |
|                               | <b>Comorbidities</b>                                |     |            |       |         |              |                    |       |             |
|                               | CKD (yes vs no)                                     | 220 | 878.9      | 389.4 | 0.025   |              |                    | 664.8 | 381.6 0.083 |
|                               | Diabetes (yes vs no)                                | 220 | -42.4      | 273.7 | 0.88    |              |                    |       |             |
|                               | Hypertension (yes vs no)                            | 220 | 443.5      | 278.7 | 0.11    |              |                    |       |             |
|                               | Cardiovascular (yes vs no)                          | 220 | 52.4       | 266.9 | 0.84    |              |                    |       |             |
|                               | Respiratory (yes vs no)                             | 220 | 341.9      | 324.3 | 0.29    |              |                    |       |             |
|                               | Immunosuppression (yes vs no)                       | 219 | 401.2      | 713.0 | 0.57    |              |                    |       |             |

| Variable | Explicative factor                                  | N   | Univariate |        |             | Multivariate |                    |         |               |
|----------|-----------------------------------------------------|-----|------------|--------|-------------|--------------|--------------------|---------|---------------|
|          |                                                     |     | Coeff      | SE     | p-value     | N            | R <sup>2</sup> (%) | Coeff   | SE p-value    |
|          | <i>Total number of these comorbidities (0 to 6)</i> | 220 | 184.4      | 108.4  | <u>0.09</u> |              |                    |         |               |
|          | Admission type (surgical vs medical)                | 220 | -423.8     | 306.4  | <u>0.17</u> |              |                    | -607.0  | 306.7 0.049   |
|          | Admission failure                                   | 220 |            |        | <u>0.15</u> |              |                    |         |               |
|          | Cardiovascular (vs pulmonary)                       |     | -221.9     | 327.5  |             |              |                    |         |               |
|          | Neurologic (vs pulmonary)                           |     | -1175.9    | 641.8  |             |              |                    |         |               |
|          | Other (vs pulmonary)                                |     | 504.6      | 468.5  |             |              |                    |         |               |
|          | SOFA at admission                                   | 147 | 37.5       | 62.2   | 0.55        |              |                    |         |               |
|          | SAPS II                                             | 132 | 2.1        | 12.6   | 0.87        |              |                    |         |               |
|          | COVID-19 (yes vs no)                                | 220 | 195.4      | 271.7  | 0.47        |              |                    |         |               |
|          | Mechanical ventilation (yes vs no)                  | 220 | -185.7     | 266.3  | 0.49        |              |                    |         |               |
|          | Neuromuscular blocking agent (yes vs no)            | 220 | -14.0      | 327.7  | 0.97        |              |                    |         |               |
|          | Tracheostomy (yes vs no)                            | 220 | -54.6      | 499.1  | 0.91        |              |                    |         |               |
|          | Vasopressor support (yes vs no)                     | 220 | -5.3       | 277.8  | 0.98        |              |                    |         |               |
|          | Renal replacement therapy (yes vs no)               | 220 | 166.5      | 586.8  | 0.78        |              |                    |         |               |
|          | ECMO (yes vs no)                                    | 220 | -6160.8    | 1936.8 | 0.0017      |              |                    | -5529.9 | 1899.4 0.0040 |
|          | ICU LOS, d (log)                                    | 220 | -50.1      | 137.7  | 0.72        |              |                    |         |               |
|          | Hospital LOS, d (log)                               | 216 | 62.1       | 153.5  | 0.69        |              |                    |         |               |
|          | Home at hospital discharge (yes vs no)              | 220 | 387.0      | 498.4  | 0.44        |              |                    |         |               |
|          | Rehab (yes vs no)                                   | 220 | -271.4     | 297.2  | 0.36        |              |                    |         |               |

**Supplemental Figure S1.** One-year functional assessment (grey boxes) compared to pre-ICU status (baseline, white boxes), in the Wave 1 and Wave 2 subgroups in the COVID group.

*\*: significant difference between baseline status and 1-y status within a group*

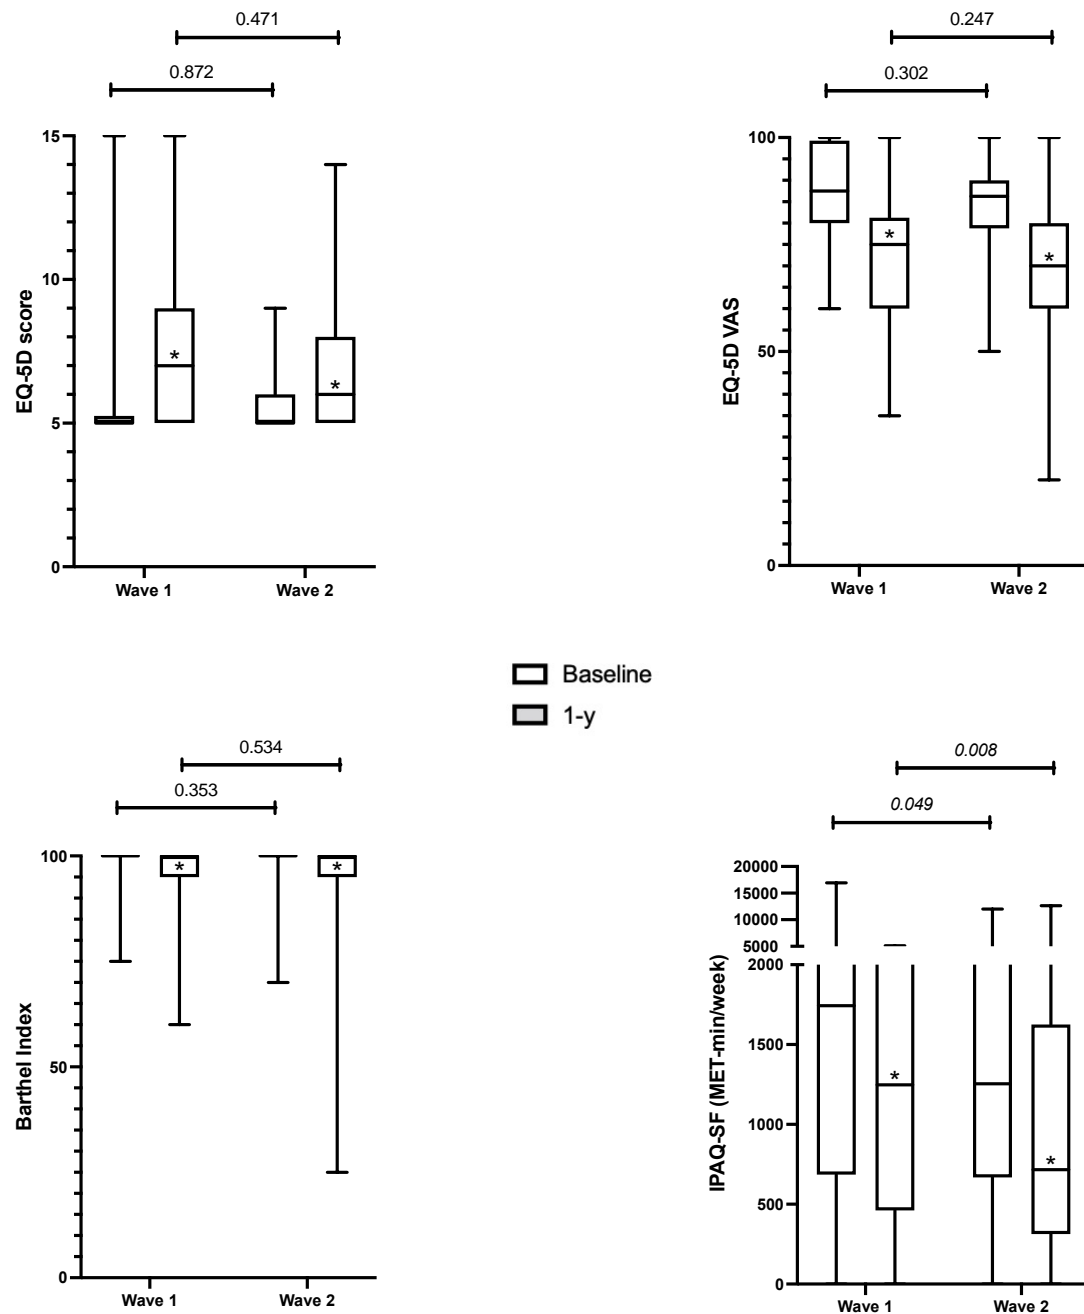

Supplement: s1 [file s1]
